# Supplementary material
Source: Royal Society of Chemistry journal article supplement (doi:10.1039/d6tc00267f)
Supplement: d6tc00267f1.pdf [file d6tc00267f1.pdf]

## Electronic Supplementary Information

# All-Solution-Processed Transparent Electrodes Consisting of Ag NW/PEDOT:PSS Composites on PVDF-HFP Flexible Substrates for 2.5V-Operating Wearable Heaters

Ji-Young You<sup>†</sup>, Gyu-Seon Hwang<sup>†</sup>, Eun-Ha Kim, and Tae-Jun Ha<sup>\*</sup>

<sup>†</sup> These authors contributed equally to this work

*Department of Electronic Materials Engineering, Kwangwoon University, Seoul 01897,*

*Republic of Korea*

*\*Corresponding author E-mail address: [taejunha0604@gmail.com](mailto:taejunha0604@gmail.com)*

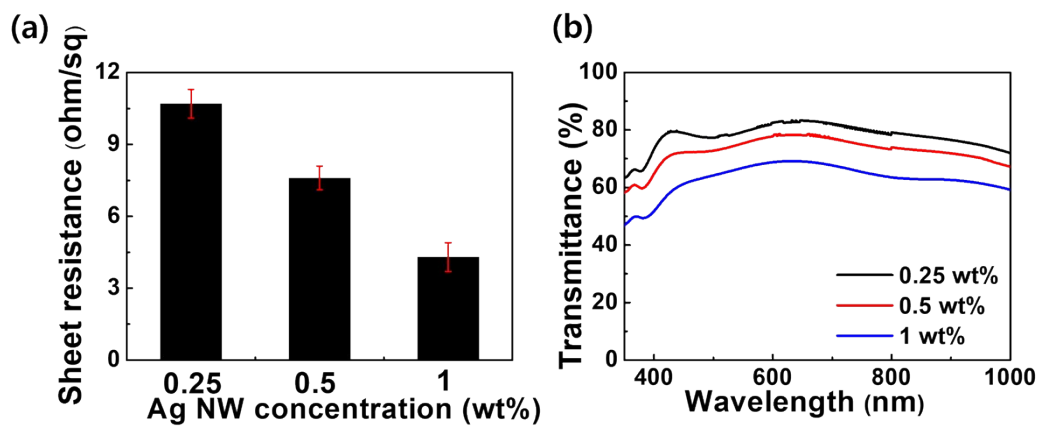

**Fig. S1.** (a) Sheet resistance and (b) optical transmittance of Ag NW electrodes synthesized with different Ag NW concentrations.

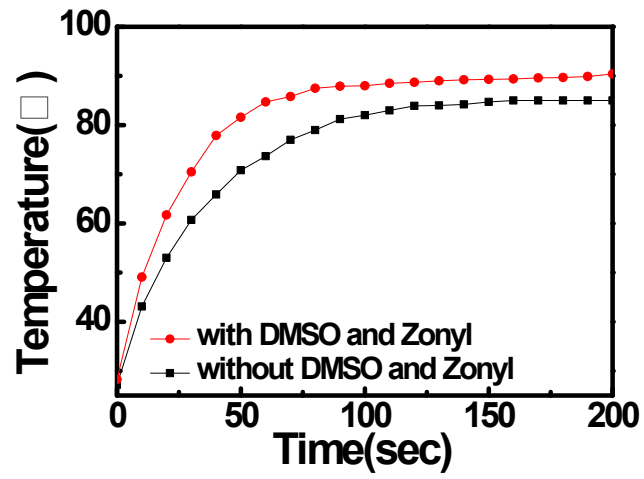

Fig. S2. Temperature profiles of Ag NW/PEDOT:PSS composite-based heaters with and without DMSO and Zonyl.

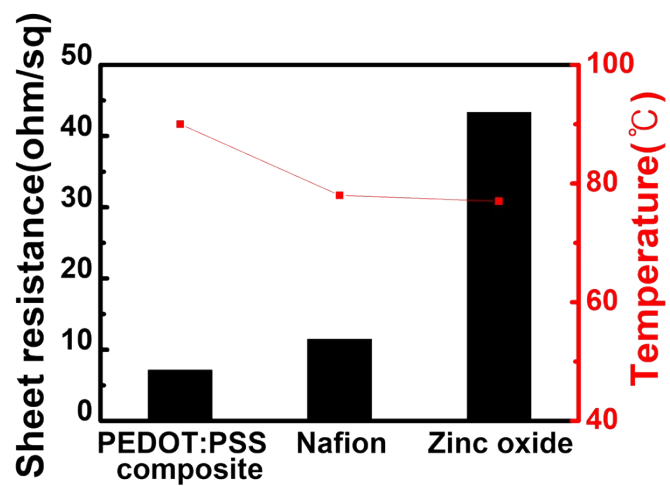

**Fig. S3.** Comparison of sheet resistance and steady-state temperature of Ag NW electrodes synthesized with different passivation materials.

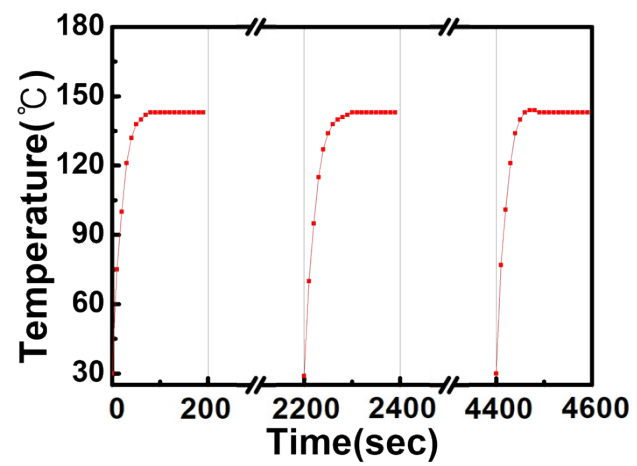

**Fig. S4.** Repeatability test of the Ag NW/PEDOT:PSS composite-based heater during three consecutive on/off heating cycles at 7 V.

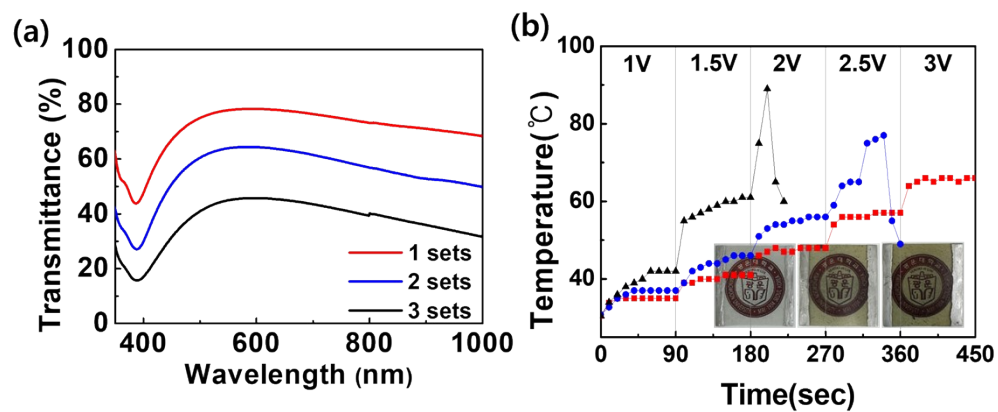

**Fig. S5.** (a) Optical transmittance spectra and (b) heating performance of Ag NW/PEDOT:PSS composite-based films with different coating sets.

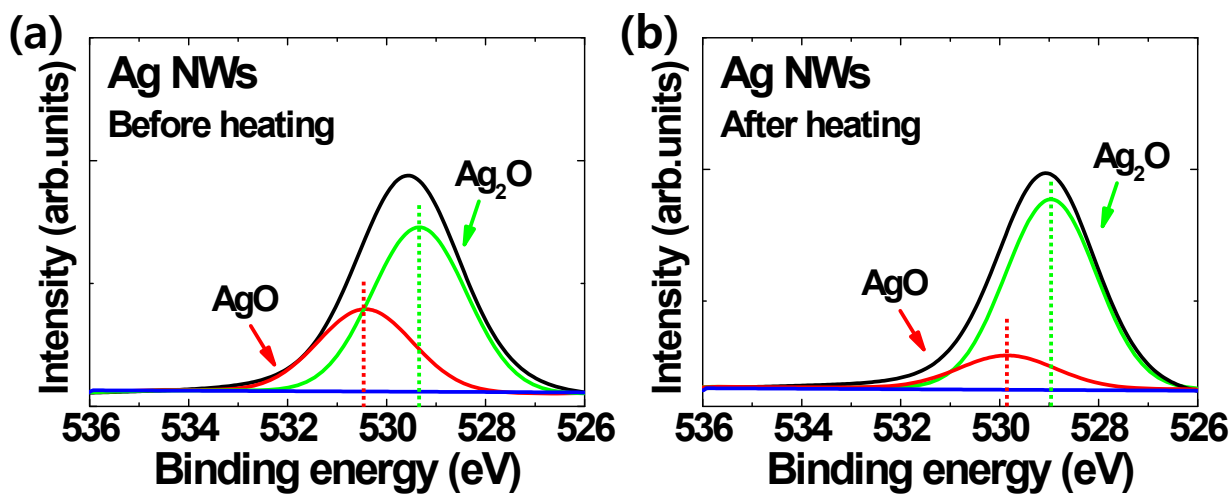

Fig. S6. O1s spectra of the Ag<sub>x</sub>O species in the Ag NWs (a) before and (b) after heating.

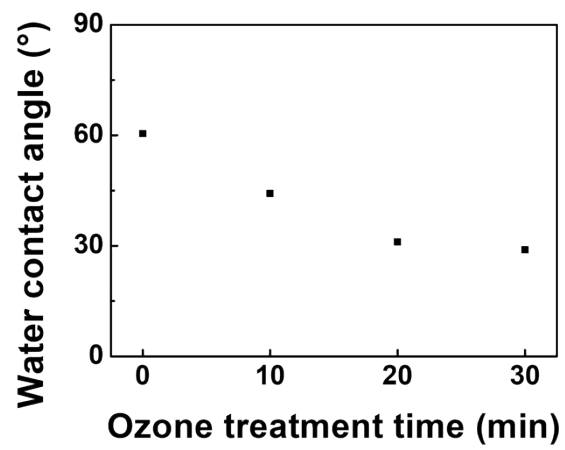

**Fig. S7.** Water contact angle of the PVDF-HFP substrate as a function of ozone-treatment time.

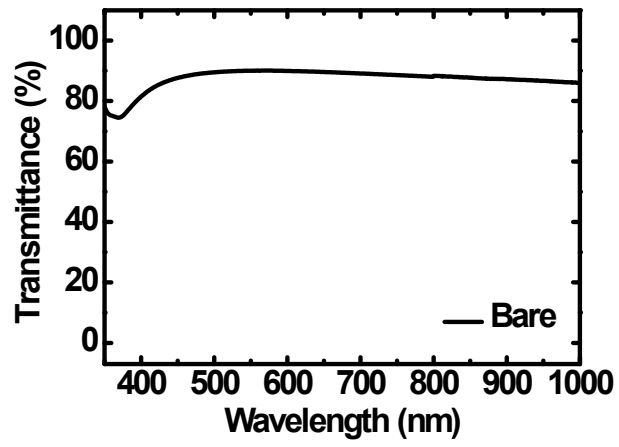

**Fig. S8.** Optical transmittance of the bare PVDF-HFP flexible substrate.

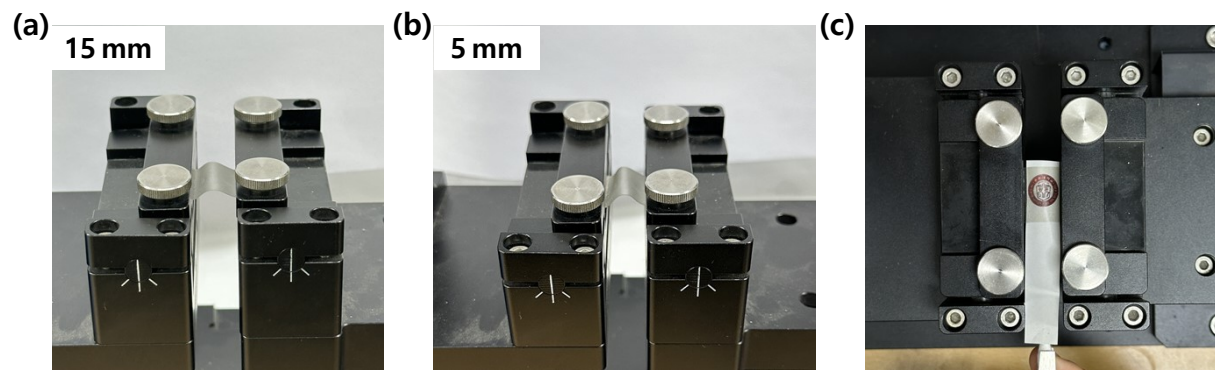

**Fig. S9.** Photographs of the instrument used for strain measurements during cyclic bending with a bending radius of (a) 15 and (b) 5 mm. (c) Photograph confirming the optical transparency of the wearable heater during the bending test.
